# Supplementary material for: Preparation of highly specific anti-zearalenone antibodies by using the cationic protein conjugate and development of an indirect competitive enzyme-linked immunosorbent assay
Source: Royal Society of Chemistry journal article supplement (doi:10.1039/c1an15487g), 2011-11-03

## Supplementary material

Analysis of cBSA (15  $\mu$ g) and nBSA (15  $\mu$ g) by a blue native-PAGE.

(1) The electrode was not reversed:

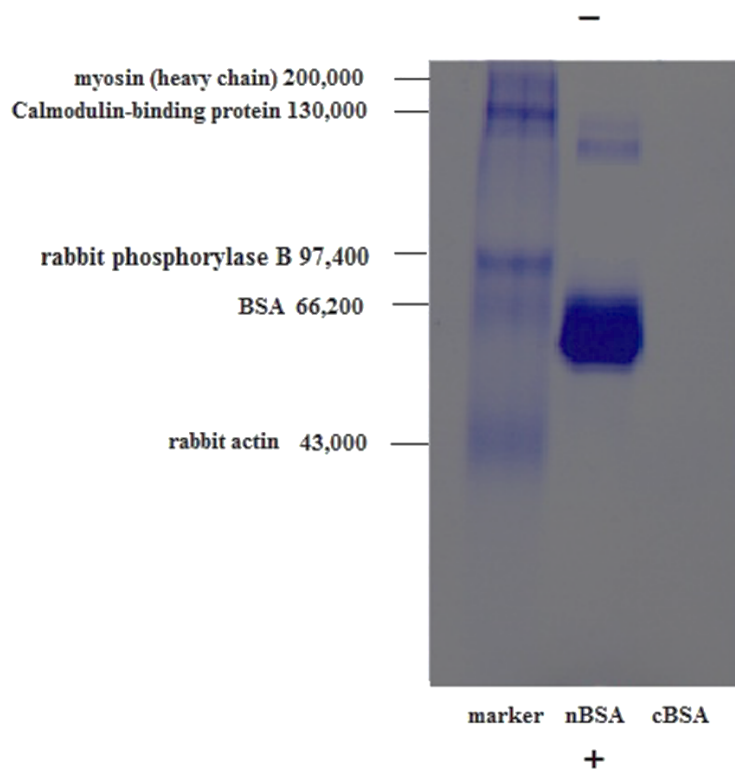

(2) The electrode was reversed:

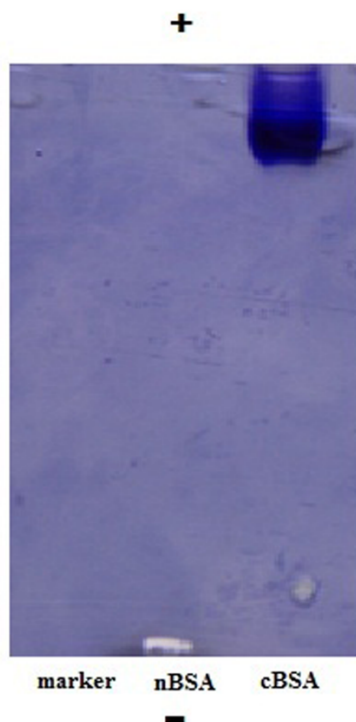

Supplement: c1an15487g.pdf [file c1an15487g.pdf]
